# Supplementary material for: Changes in the nitrate assimilation pathway serve as a component of maize stress response to competition cues
Source: Front Plant Sci. 2025 Sep 9;16:1617659. doi: 10.3389/fpls.2025.1617659 (PMC12454449; doi:10.3389/fpls.2025.1617659)
Supplement: Supplementary file 1 [file Table1.xlsx]

## Sheet: Inter-specific competition
Supplementary Table 1: Light composition in the inter-specific and intra-specific competition experiments
Light composition in the weed-free control, biological, and artificial low R:FR light treatments was measured by a LI-COR 180 spectrometer.
Measurements were taken in 10 locations across each treatment.
The R:FR ratios were calculated by dividing the photon flux density of red by photon flux density of far-red.
PPFD: photosynthetic photon flux density (μmol/m²/s); PFD-B: photon flux density blue; PFD-G: photon flux density green; PFD-R: photon flux density red; PFD: photon flux density; PFD-UV: photon flux density ultraviolet; PFD-FR: photon flux density far-red; R/FR: red to far-red ratio
Summary
	PPFD		PFD-B		PFD-G		PFD-R		PFD		PFD-UV		PFD-FR		R:FR
Treatments	Incoming	Reflected	Incoming	Reflected	Incoming	Reflected	Incoming	Reflected	Incoming	Reflected	Incoming	Reflected	Incoming	Reflected	Incoming	Reflected
Weed-free control	552.38	123.63	113.82	21.176	237.25	53.677	207.57	49.377	630.3	141.82	2.129	0.29089	73.6	18.166	2.82505	2.71802
Biologica low R:FR light	568.13	20.585	117.69	2.655	242.39	10.6909	210.75	7.3369	645.89	34.912	2.4996	0.06095	76.778	14.322	2.74527	0.512022
Artificial low R:FR light	563.46	121.05	88.369	15.633	184.99	39.548	175	37.025	786.9	118.77	1.9513	0.2973	340.73	26.981	0.516747	1.3765
Detail
	PPFD		PFD-B		PFD-G		PFD-R		PFD		PFD-UV		PFD-FR		R:FR
Treatment	Incoming	Reflected	Incoming	Reflected	Incoming	Reflected	Incoming	Reflected	Incoming	Reflected	Incoming	Reflected	Incoming	Reflected	Incoming	Reflected
Weed-free control 1	514.7	126.7	104.9	22.03	219.9	55.02	192.4	50.27	580.8	144.9	1.921	0.2893	65.25	18.13	2.94866	2.77275
Weed-free control 2	522.4	126	106.7	21.9	223.1	54.75	195.2	49.94	589.8	143.9	2.006	0.2808	66.71	17.94	2.9261	2.78372
Weed-free control 3	552.7	117.2	113.2	19.9	235.9	50.95	206.2	46.9	625.1	134.8	2.103	0.268	71.73	17.59	2.87467	2.66629
Weed-free control 4	548.2	114.3	112.4	19.39	233.9	49.54	204.6	45.95	620.2	131.3	2.07	0.2721	71.26	16.97	2.87118	2.70772
Weed-free control 5	564.9	117.8	116	20.19	241	51.16	210.5	47.02	639.6	135.2	2.221	0.2747	73.95	17.34	2.84652	2.71165
Weed-free control 6	567.8	124.7	116.6	21.48	242.2	54.11	211.7	49.68	644.2	143.2	2.229	0.2884	75.66	18.49	2.79804	2.68686
Weed-free control 7	537.1	127.8	117.4	21.98	244.4	55.49	214	50.93	651.5	146.6	2.188	0.3048	77.75	18.81	2.75241	2.7076
Weed-free control 8	570.1	125	116.7	21.18	243.2	54.27	212.9	50.18	647.7	143.5	2.148	0.297	76.89	18.48	2.76889	2.71537
Weed-free control 9	560.5	130.7	114.4	22.29	239.1	56.78	209.7	52.29	637	149.9	2.121	0.3171	75.8	19.12	2.76649	2.73483
Weed-free control 10	585.4	126.1	119.9	21.42	249.8	54.7	218.5	50.61	667.1	144.9	2.283	0.3167	81	18.79	2.69753	2.69345
Average	552.38	123.63	113.82	21.176	237.25	53.677	207.57	49.377	630.3	141.82	2.129	0.29089	73.6	18.166	2.82505	2.71802
	PPFD		PFD-B		PFD-G		PFD-R		PFD		PFD-UV		PFD-FR		R:FR
Treatment	Incoming	Reflected	Incoming	Reflected	Incoming	Reflected	Incoming	Reflected	Incoming	Reflected	Incoming	Reflected	Incoming	Reflected	Incoming	Reflected
Biologica low R:FR light 1	542	18.71	112.3	2.329	231.1	9.802	201.3	6.656	616.4	31.36	2.399	0.0572	73.44	12.66	2.74101	0.52575
Biologica low R:FR light 2	544.2	20.02	113	2.49	232.1	10.52	201.6	7.103	618.8	34.48	2.491	0.0573	73.66	14.46	2.7369	0.491217
Biologica low R:FR light 3	528.4	18.51	109.3	2.491	224.8	9.423	196.8	6.679	602.3	31.41	2.373	0.0565	72.98	12.9	2.69663	0.517752
Biologica low R:FR light 4	542.5	18.45	112.3	2.229	230.5	9.681	202.2	6.623	619.2	31.62	2.504	0.0556	75.66	13.17	2.67248	0.502885
Biologica low R:FR light 5	571.5	22.1	118	3.004	243.7	11.27	212.5	7.93	651.7	35.81	2.489	0.0671	79.24	13.71	2.68173	0.57841
Biologica low R:FR light 6	588	18.75	121.6	2.385	250.8	9.823	218.4	6.629	670	33.49	2.593	0.0602	80.88	14.74	2.7003	0.449729
Biologica low R:FR light 7	590.2	27.3	122.2	3.616	252.2	14.06	218.7	9.74	670.8	44.44	2.567	0.0807	79.61	17.14	2.74714	0.568261
Biologica low R:FR light 8	601	20.23	124.5	2.606	256.9	10.58	222.4	7.2	682.1	35.25	2.588	0.0579	80.16	14.96	2.77445	0.481283
Biologica low R:FR light 9	599	21.44	124.3	2.844	256	11.02	221.6	7.667	678.7	36.09	2.568	0.0617	78.69	14.65	2.81611	0.523345
Biologica low R:FR light 10	574.5	20.34	119.4	2.556	245.8	10.73	212	7.142	648.9	35.17	2.424	0.0553	73.46	14.83	2.88592	0.481591
Average	568.13	20.585	117.69	2.655	242.39	10.6909	210.75	7.3369	645.89	34.912	2.4996	0.06095	76.778	14.322	2.74527	0.512022
	PPFD		PFD-B		PFD-G		PFD-R		PFD		PFD-UV		PFD-FR		R:FR
Treatment	Incoming	Reflected	Incoming	Reflected	Incoming	Reflected	Incoming	Reflected	Incoming	Reflected	Incoming	Reflected	Incoming	Reflected	Incoming	Reflected
Artificial low R:FR light 1	519.6	92.5	100.02	14.29	207.4	37.12	191.7	33.7	837.3	115.1	2.324	0.2666	340.2	30.37	0.563492	1.10965
Artificial low R:FR light 2	547.1	117.2	84.85	16.54	178.2	41.37	171.3	38.67	783.5	122.4	1.824	0.3021	351.5	26.21	0.48734	1.47539
Artificial low R:FR light 3	553.5	117.6	85.53	16.22	179.3	40.86	171.1	38.29	733.4	122.1	1.858	0.2974	299.6	27.13	0.571095	1.41135
Artificial low R:FR light 4	562.4	122.3	86.25	16.41	180.9	41.37	173.7	38.78	811.6	123.1	1.871	0.31	373.1	27.1	0.465559	1.431
Artificial low R:FR light 5	560.4	115	90.44	16.91	189.2	42.43	178.1	39.72	754.4	125.3	2.02	0.327	298.8	26.69	0.596051	1.4882
Artificial low R:FR light 6	574.5	119.8	86.46	16.29	181.1	40.62	172.4	38.29	816.8	120.3	1.925	0.3062	379	25.56	0.454881	1.49804
Artificial low R:FR light 7	575.5	123.1	84.53	14.61	177.6	37.51	169.8	35.12	770.9	112.2	1.91	0.2858	341.1	25.35	0.497801	1.3854
Artificial low R:FR light 8	579.1	132.3	90.52	15.24	189.5	39.17	177.7	36.5	810.5	118	1.966	0.294	355.1	27.49	0.500422	1.32776
Artificial low R:FR light 9	581.4	134.2	89.96	16.15	188.1	39.94	175.4	37.85	775.1	121.6	1.93	0.3116	323.8	28.04	0.541692	1.34986
Artificial low R:FR light 10	581.1	136.5	85.13	13.67	178.6	35.09	168.8	33.33	775.5	107.6	1.885	0.2723	345.1	25.87	0.489134	1.28836
Average	563.46	121.05	88.369	15.633	184.99	39.548	175	37.025	786.9	118.77	1.9513	0.2973	340.73	26.981	0.516747	1.3765

## Sheet: Intra-specific competition
Light composition for soybean in the absence of kin plants and in the presence of six kin plants was measured by a LI-COR 180 spectrometer.
Measurements were taken in 10 locations across each treatment.
The R:FR ratios were calculated by dividing the photon flux density of red by photon flux density of far-red.
PPFD: photosynthetic photon flux density (μmol/m²/s); PFD-B: photon flux density blue; PFD-G: photon flux density green; PFD-R: photon flux density red; PFD: photon flux density; PFD-UV: photon flux density ultraviolet; PFD-FR: photon flux density far-red; R/FR: red to far-red ratio
Summary
	PPFD		PFD-B		PFD-G		PFD-R		PFD		PFD-UV		PFD-FR		R/FR
Treatment	Incoming	Reflected	Incoming	Reflected	Incoming	Reflected	Incoming	Reflected	Incoming	Reflected	Incoming	Reflected	Incoming	Reflected	Incoming	Reflected
No kin	526.76	58.616	110.88	10.0278	225.18	26.268	193.21	22.599	597.59	70.96	2.5676	0.20031	69.652	12.284	2.7746	1.84257
Six kins	523.49	19.533	111.16	2.5142	222.02	10.5658	193.01	6.5333	599.75	32.11	3.4276	0.11634	74.137	12.5271	2.60885	0.521245
Detail
	PPFD		PFD-B		PFD-G		PFD-R		PFD		PFD-UV		PFD-FR		R/FR
Treatment	Incoming	Reflected	Incoming	Reflected	Incoming	Reflected	Incoming	Reflected	Incoming	Reflected	Incoming	Reflected	Incoming	Reflected	Incoming	Reflected
No kin 1	489.4	60.5	102.7	10.33	209.4	26.97	179.6	23.49	553.4	72.89	2.364	0.2024	62.99	12.33	2.85125	1.90511
No kin 2	538.3	62.71	113.1	10.78	229.8	27.8	198	24.43	610.9	74.92	2.596	0.2117	71.41	12.15	2.77272	2.0107
No kin 3	541.9	58.39	113.9	10.01	231.4	26.02	199.2	22.64	615.2	70.28	2.629	0.2004	72.07	11.83	2.76398	1.91378
No kin 4	558.2	52.82	117.8	8.951	238.5	23.87	204.5	20.25	633.3	64.59	2.692	0.175	73.92	11.72	2.7665	1.72782
No kin 5	530.4	61.94	112	10.69	227	27.81	194	23.73	602.9	75.31	2.582	0.2098	71.27	13.31	2.72204	1.78287
No kin 6	526.3	65.8	110.8	11.26	225.1	29	193	25.86	599.1	78.33	2.581	0.2264	71.62	12.46	2.69478	2.07544
No kin 7	511	57.17	107.6	9.921	218.8	25.39	187	22.13	580.9	68.73	2.508	0.1988	68.76	11.5	2.7196	1.92435
No kin 8	480	49.53	100.7	8.48	205	22.27	176.5	19.01	546	60.31	2.426	0.1759	64.85	10.72	2.72167	1.77332
No kin 9	560	55.4	118.1	9.296	239.5	25.36	205.1	21.01	632.6	68.57	2.676	0.1901	71.37	13.11	2.87376	1.60259
No kin 10	532.1	61.9	112.1	10.56	227.3	28.19	195.2	23.44	601.6	75.67	2.622	0.2126	68.26	13.71	2.85965	1.7097
Average	526.76	58.616	110.88	10.0278	225.18	26.268	193.21	22.599	597.59	70.96	2.5676	0.20031	69.652	12.284	2.7746	1.84257
	PPFD		PFD-B		PFD-G		PFD-R		PFD		PFD-UV		PFD-FR		R/FR
Treatment	Incoming	Reflected	Incoming	Reflected	Incoming	Reflected	Incoming	Reflected	Incoming	Reflected	Incoming	Reflected	Incoming	Reflected	Incoming	Reflected
Six kins 1	517.1	11.94	109.9	1.686	218.7	6.254	191	4.044	590.2	20.26	3.499	0.0799	71.06	8.287	2.68787	0.487993
Six kins 2	493.3	22.48	104.8	2.964	209.1	12.19	182.7	7.42	563.5	35.4	3.388	0.1353	67.29	12.85	2.71511	0.577432
Six kins 3	496.4	16.42	104.9	2.067	210.6	8.732	183.3	5.693	564.8	26.11	3.309	0.0951	66.5	9.644	2.75639	0.590315
Six kins 4	542.4	22.97	115.2	3.079	230.4	12.28	199.3	7.708	621.2	36.5	3.421	0.1283	76.93	13.48	2.59067	0.57181
Six kins 5	539.5	20.91	114.8	2.693	229	11.32	198.3	6.98	619.3	34.74	3.467	0.1242	77.8	13.77	2.54884	0.506899
Six kins 6	536.2	16.52	113.8	1.959	227.5	9.302	197.4	5.324	613.3	29.63	3.433	0.1035	75.25	13.07	2.62326	0.407345
Six kins 7	494.7	18.32	104.9	2.154	209.7	10.45	182.5	5.785	565.7	32.5	3.28	0.1171	69.19	14.13	2.63766	0.409413
Six kins 8	524.4	23.38	111.7	3.037	222.8	12.29	193.4	8.153	607	36.18	3.431	0.1291	79.76	12.75	2.42477	0.639451
Six kins 9	556.1	15.56	117.9	1.851	235.6	8.65	205.3	5.12	638	27.41	3.596	0.0921	79.87	11.82	2.57043	0.433164
Six kins 10	534.8	26.83	113.7	3.652	226.8	14.19	196.9	9.106	614.5	42.37	3.452	0.1588	77.72	15.47	2.53345	0.588623
Average	523.49	19.533	111.16	2.5142	222.02	10.5658	193.01	6.5333	599.75	32.11	3.4276	0.11634	74.137	12.5271	2.60885	0.521245
